# Supplementary material for: A comparative modeling study on non-climatic and climatic risk assessment on Asian Tiger Mosquito (Aedes albopictus)
Source: PeerJ. 2018 Mar 19;6:e4474. doi: 10.7717/peerj.4474 (PMC5863722; doi:10.7717/peerj.4474)
Supplement: Supplemental Information 1 — Details of Inventory classification. [file peerj-06-4474-s001.xlsx]

## Sheet: SLOPE
CLASSES
0 - 2.71
2.72 - 5.12
5.13 - 7.84
7.85 - 10.55
10.56 - 13.86
13.87 - 17.48
17.49 - 21.7
21.71 - 26.82
26.83 - 33.75
33.76 - 76.85

## Sheet: road
classes
0 - 252.46
252.47 - 757.38
757.39 - 1,262.3
1,262.31 - 1,767.22
1,767.23 - 2,524.59
2,524.6 - 3,281.97
3,281.98 - 4,291.81
4,291.82 - 5,554.11
5,554.12 - 7,573.78
7,573.79 - 64,124.67

## Sheet: river
classes
0 - 9,601.28
9,601.29 - 22,402.98
22,402.99 - 35,204.69
35,204.7 - 49,606.6
49,606.61 - 65,608.73
65,608.74 - 83,211.08
83,211.09 - 102,413.63
102,413.64 - 126,416.83
126,416.84 - 161,621.51
161,621.52 - 408,054.31
